# Supplementary material
Source: publisher figshare collection journal article supplement (https://aacr.figshare.com/articles/dataset/_/23791953)
Supplement: Supplementary file 1 [file 41730147]

## Supplementary Materials

**Supplementary Figure S1.** Flowchart of patients' selection.

**Supplementary Figure S2.** Hierarchical clustering of HED.

**Supplementary Figure S3.** Association of HED with prognosis in TCGA lung cancer patients.

**Supplementary Figure S4.** HED<sup>high</sup> predicts outcomes of PD-1 blockade plus chemotherapy in all patients.

**Supplementary Figure S5.** Association of HED at each HLA class I locus with treatment response and outcomes in Camel trial.

**Supplementary Figure S6.** Association of HED at each HLA class I locus with treatment response and outcomes in Camel-sq trial.

**Supplementary Figure S7.** Effect of mean HED on HR from PFS across all possible cut points and association of HLA-I LOH with survival in all patients.

**Supplementary Figure S8.** Combination of mean HED and PD-L1 expression showed better predictive performance in Camel-sq trial.

**Supplementary Figure S9.** Association of HED at each HLA class I locus with PD-L1 expression level, TMB and neoantigen burden.

**Supplementary Figure S10.** Predictive value of joint utility of mean HED and TMB.

**Supplementary Figure S11.** Predictive value of HED<sup>high</sup> in patients treated with PD-1 blockade plus chemotherapy according to TMB level.

**Supplementary Figure S12.** Identification of major cell types in patients with untreated NSCLC.

**Supplementary Figure S13.** Characterization of immune cell types in patients with untreated NSCLC.

**Supplementary Table S1.** Baseline characteristics of included patients from the biomarker evaluable population and intention-to-treat trial in Camel trial.

**Supplementary Table S2.** Baseline characteristics of included patients from the biomarker evaluable population and intention-to-treat trial in Camel-sq trial.

**Supplementary Table S3.** Baseline parameters of included 11 patients.

**Supplementary Table S4.** Table of Research Resource Identifier.

## Supplementary Figure S1. Flowchart of patients' selection

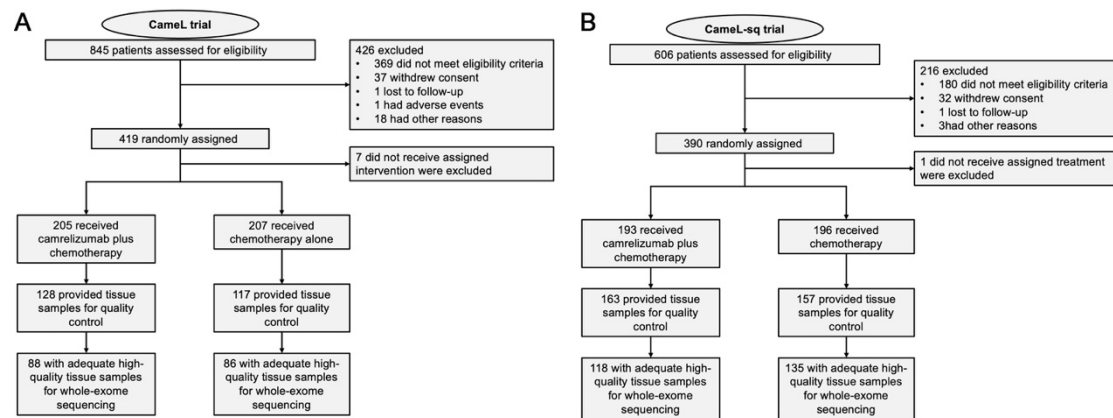

**A**, Flowchart of patients' selection in the Camel trial. **B**, Flowchart of patients' selection in the Camel-sq trial. mIF: multiplex immunofluorescence.

## Supplementary Figure S2. Hierarchical clustering of HED.

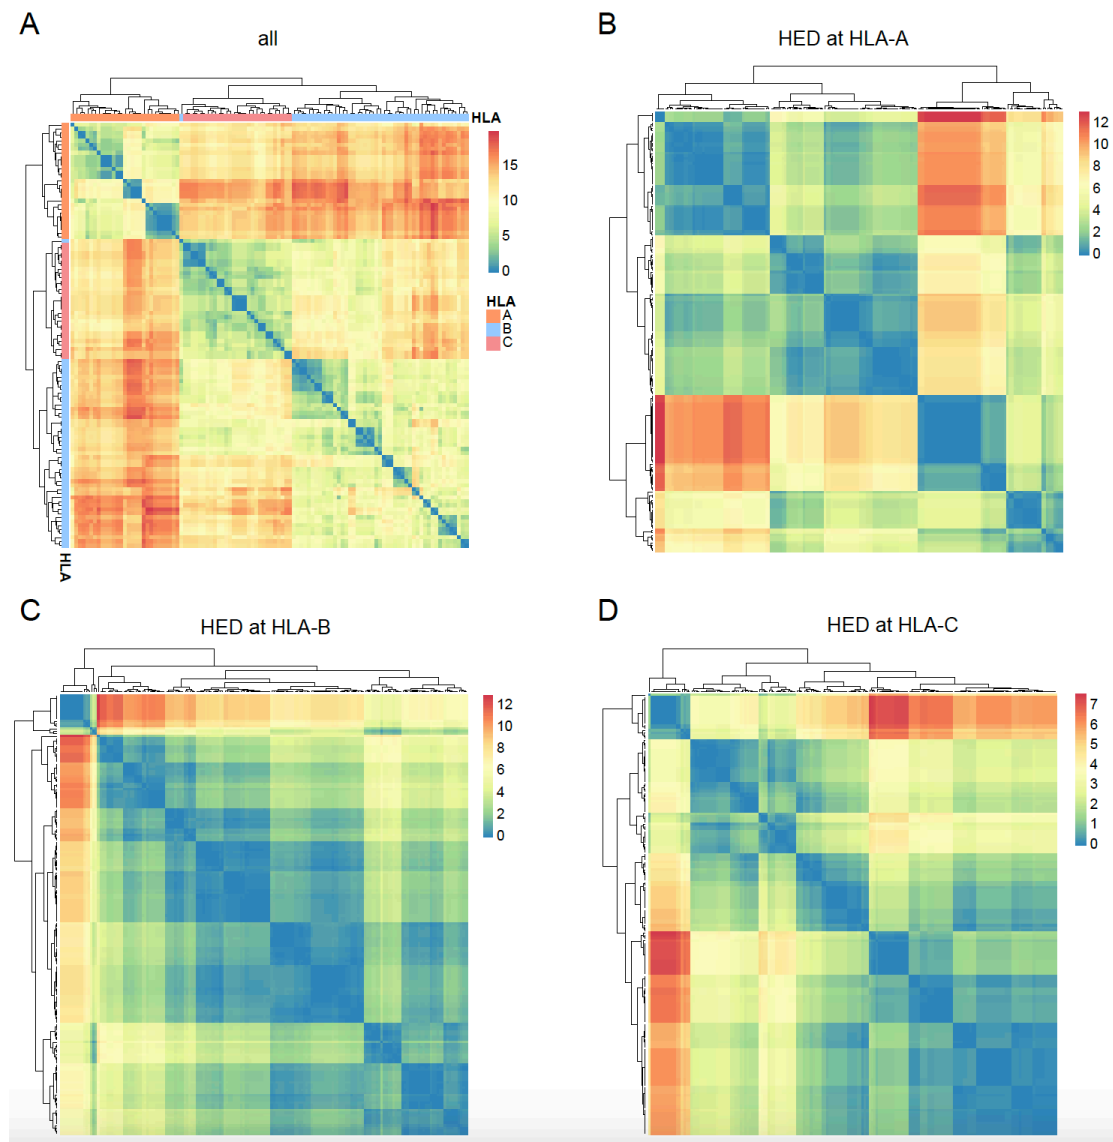

**A**, Hierarchical clustering of HED at individual HLA-I loci in CamelL trial. **B**, Hierarchical clustering of HED at HLA-A using all HLA-A alleles from all patient of CamelL trial. **C**, Hierarchical clustering of HED at HLA-B using all HLA-B alleles from all patient of CamelL trial. **D**, Hierarchical clustering of HED at HLA-C using all HLA-C alleles from all patient of CamelL trial. The heatmap shows z score-normalized HED across all alleles in all patient of CamelL trial. The color gradient of blue to red indicates low HED between allele pairs to high HED between allele pairs, respectively.

**Supplementary Figure S3. Association of HED with prognosis in TCGA lung cancer patients.**

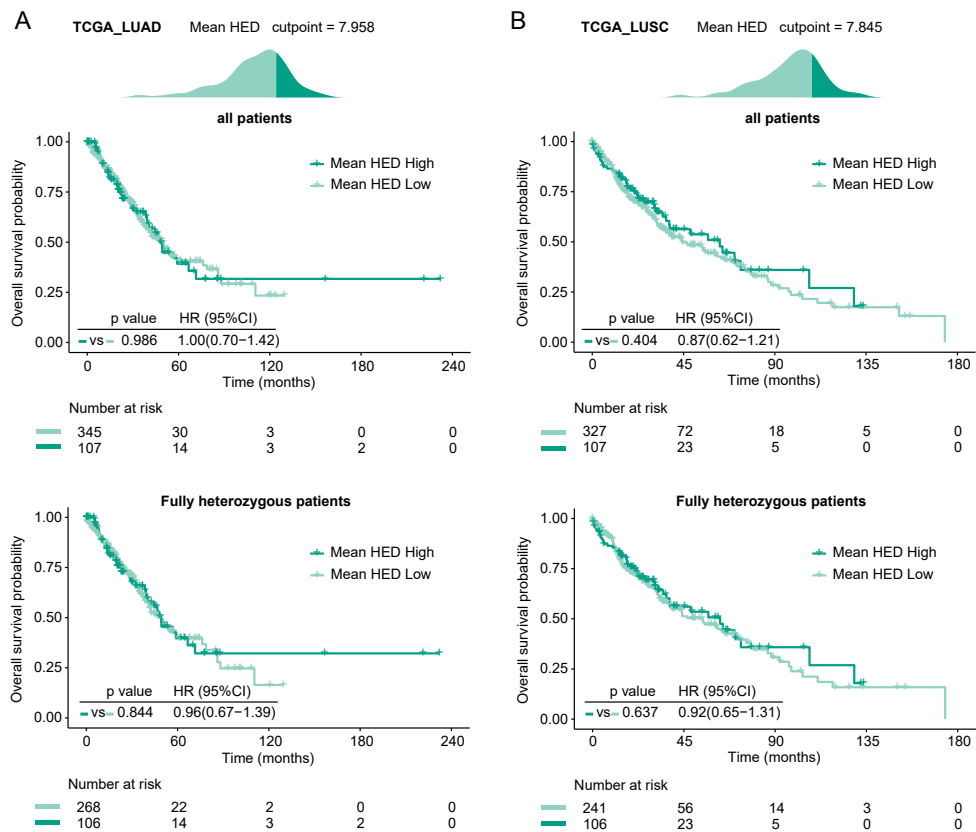

**A**, HED (upper left) and full heterozygosity at HLA-I (bottom left) is not associated with prognosis in TCGA lung adenocarcinoma. **B**, HED (upper right) and full heterozygosity at HLA-I (bottom right) is not associated with prognosis in TCGA lung squamous cell carcinoma.

**Supplementary Figure S4. HED<sup>high</sup> predicts outcomes of PD-1 blockade plus chemotherapy in all patients.**

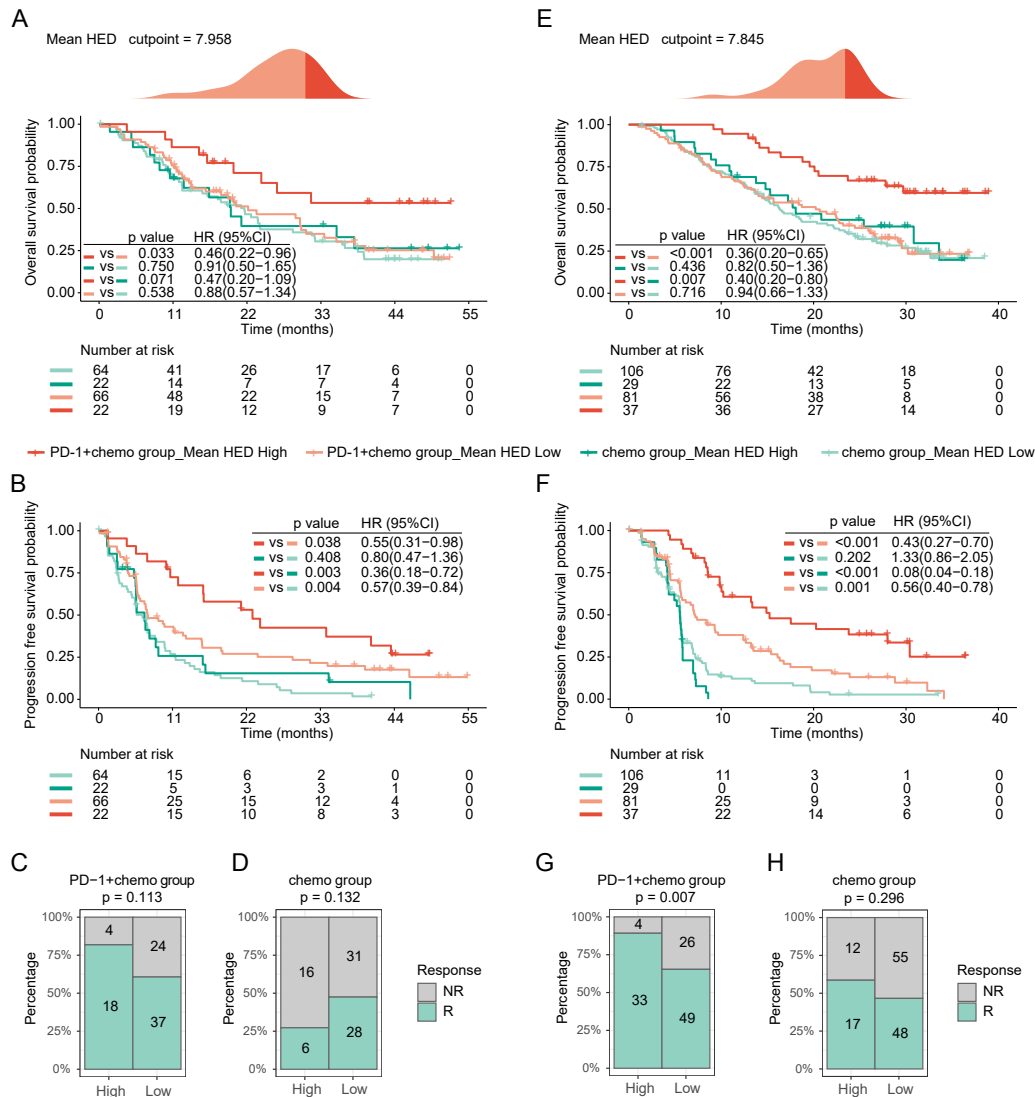

**A**, Association of HED<sup>high</sup> with OS after PD-1 blockade plus chemotherapy or chemotherapy in Camel trial of all patients (two-sided log-rank test). Density plots show the distribution and cut point (top quartile) for mean HED used in Kaplan-Meier analysis. **B**, Association of HED<sup>high</sup> with PFS after PD-1 blockade plus chemotherapy or chemotherapy in Camel trial of all patients (two-sided log-rank test). **V**, Comparison of response rates between HED<sup>high</sup> and HED<sup>low</sup> groups in PD-1 blockade plus chemotherapy arm in Camel trial of all patients (two-sided Fisher's exact test). **D**, Comparison of response rates between HED<sup>high</sup> and HED<sup>low</sup> groups in chemotherapy arm in Camel trial of all patients (two-sided Fisher's exact test). **E**, Association of HED<sup>high</sup> with OS after PD-1 blockade plus chemotherapy or chemotherapy in Camel-sq trial of all patients (two-sided log-rank test). Density plots show the distribution and cut point (top quartile) for

mean HED used in Kaplan-Meier analysis. **F**, Association of HED<sup>high</sup> with PFS after PD-1 blockade plus chemotherapy or chemotherapy in CameL-sq trial of all patients (two-sided log-rank test). **G**, Comparison of response rates between HED<sup>high</sup> and HED<sup>low</sup> groups in PD-1 blockade plus chemotherapy arm in CameL-sq trial of all patients (two-sided Fisher's exact test). **H**, Comparison of response rates between HED<sup>high</sup> and HED<sup>low</sup> groups in chemotherapy arm in CameL-sq trial of all patients (two-sided Fisher's exact test). HR, hazard ratio; CI, confidence interval; PD-1+chemo, PD-1 blockade plus chemotherapy; Chemo, chemotherapy; TPS, tumor proportional score; TMB, tumor mutational burden. R, response, included patients with complete and partial response per RECIST v1.1; NR, not response included patients with stable disease and disease progression per RECIST v1.1.

**Supplementary Figure S5. Association of HED at each HLA class I locus with treatment response and outcomes in CamelL trial.**

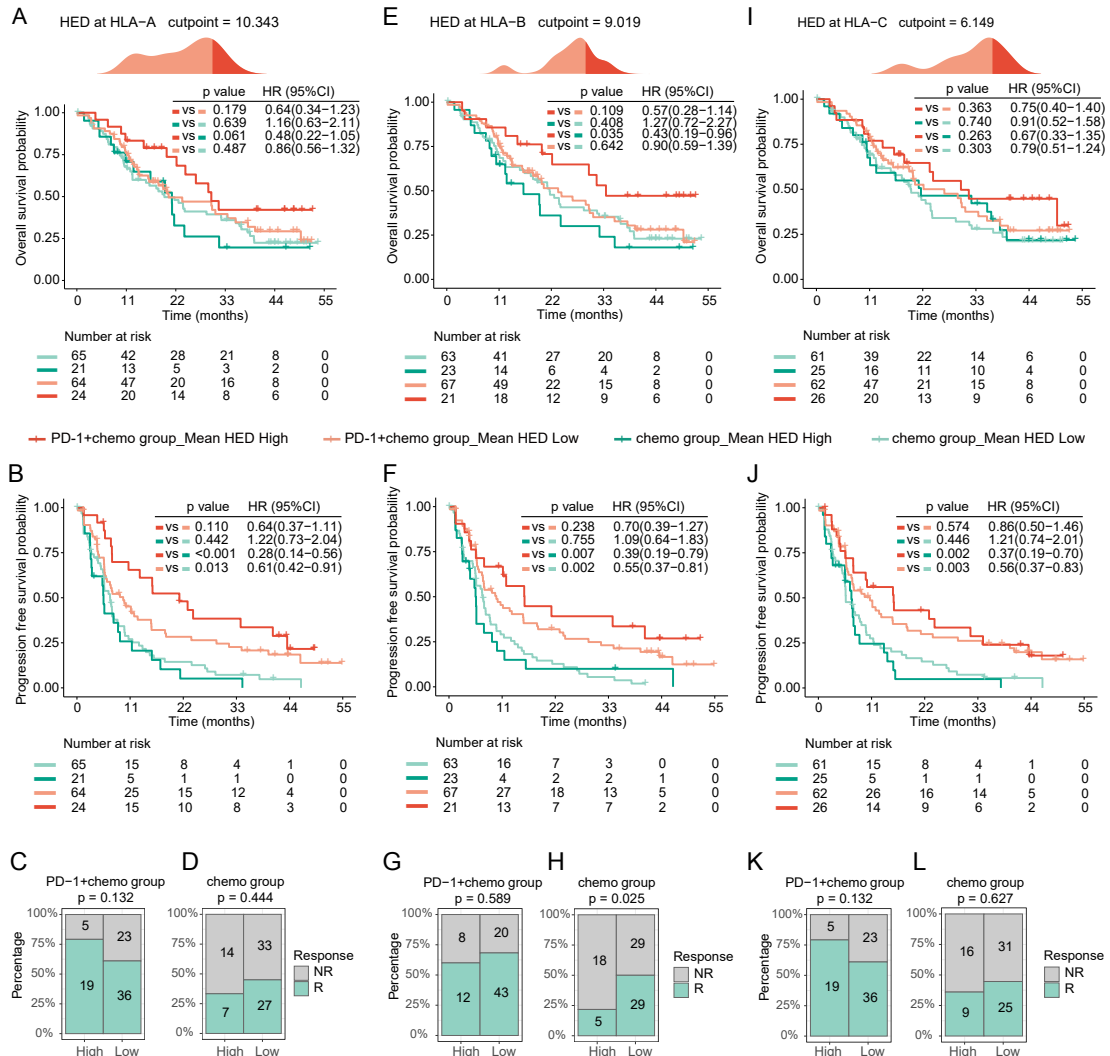

**A**, Association of HLA-A HED<sup>high</sup> with OS after PD-1 blockade plus chemotherapy or chemotherapy in CamelL trial of all patients (two-sided log-rank test). Density plots show the distribution and cut point (top quartile) for HLA-A mean HED used in Kaplan-Meier analysis. **B**, Association of HLA-A HED<sup>high</sup> with PFS after PD-1 blockade plus chemotherapy or chemotherapy in CamelL trial of all patients (two-sided log-rank test). **C**, Comparison of response rates between HLA-A HED<sup>high</sup> and HED<sup>low</sup> groups in PD-1 blockade plus chemotherapy arm in CamelL trial of all patients (two-sided Fisher's exact test). **D**, Comparison of response rates between HLA-A HED<sup>high</sup> and HED<sup>low</sup> groups in chemotherapy arm in CamelL trial of all patients (two-sided Fisher's exact test). **E**, Association of HLA-B HED<sup>high</sup> with OS after PD-1 blockade plus chemotherapy or chemotherapy in CamelL trial of all patients (two-sided

log-rank test). Density plots show the distribution and cut point (top quartile) for HLA-B mean HED used in Kaplan-Meier analysis. **F**, Association of HLA-B HED<sup>high</sup> with PFS after PD-1 blockade plus chemotherapy or chemotherapy in Camel trial of all patients (two-sided log-rank test). **G**, Comparison of response rates between HLA-B HED<sup>high</sup> and HED<sup>low</sup> groups in PD-1 blockade plus chemotherapy arm in Camel trial of all patients (two-sided Fisher's exact test). **H**, Comparison of response rates between HLA-B HED<sup>high</sup> and HED<sup>low</sup> groups in chemotherapy arm in Camel trial of all patients (two-sided Fisher's exact test). **I**, Association of HLA-C HED<sup>high</sup> with OS after PD-1 blockade plus chemotherapy or chemotherapy in Camel trial of all patients (two-sided log-rank test). Density plots show the distribution and cut point (top quartile) for HLA-C mean HED used in Kaplan-Meier analysis. **J**, Association of HLA-C HED<sup>high</sup> with PFS after PD-1 blockade plus chemotherapy or chemotherapy in Camel trial of all patients (two-sided log-rank test). **K**, Comparison of response rates between HLA-C HED<sup>high</sup> and HED<sup>low</sup> groups in PD-1 blockade plus chemotherapy arm in Camel trial of all patients (two-sided Fisher's exact test). **L**, Comparison of response rates between HLA-C HED<sup>high</sup> and HED<sup>low</sup> groups in chemotherapy arm in Camel trial of all patients (two-sided Fisher's exact test). HR, hazard ratio; CI, confidence interval; PD-1+chemo, PD-1 blockade plus chemotherapy; Chemo, chemotherapy; TPS, tumor proportional score; TMB, tumor mutational burden. R, response, included patients with complete and partial response per RECIST v1.1; NR, not response included patients with stable disease and disease progression per RECIST v1.1.



**Supplementary Figure S6. Association of HED at each HLA class I locus with treatment response and outcomes in Camel-sq trial.**

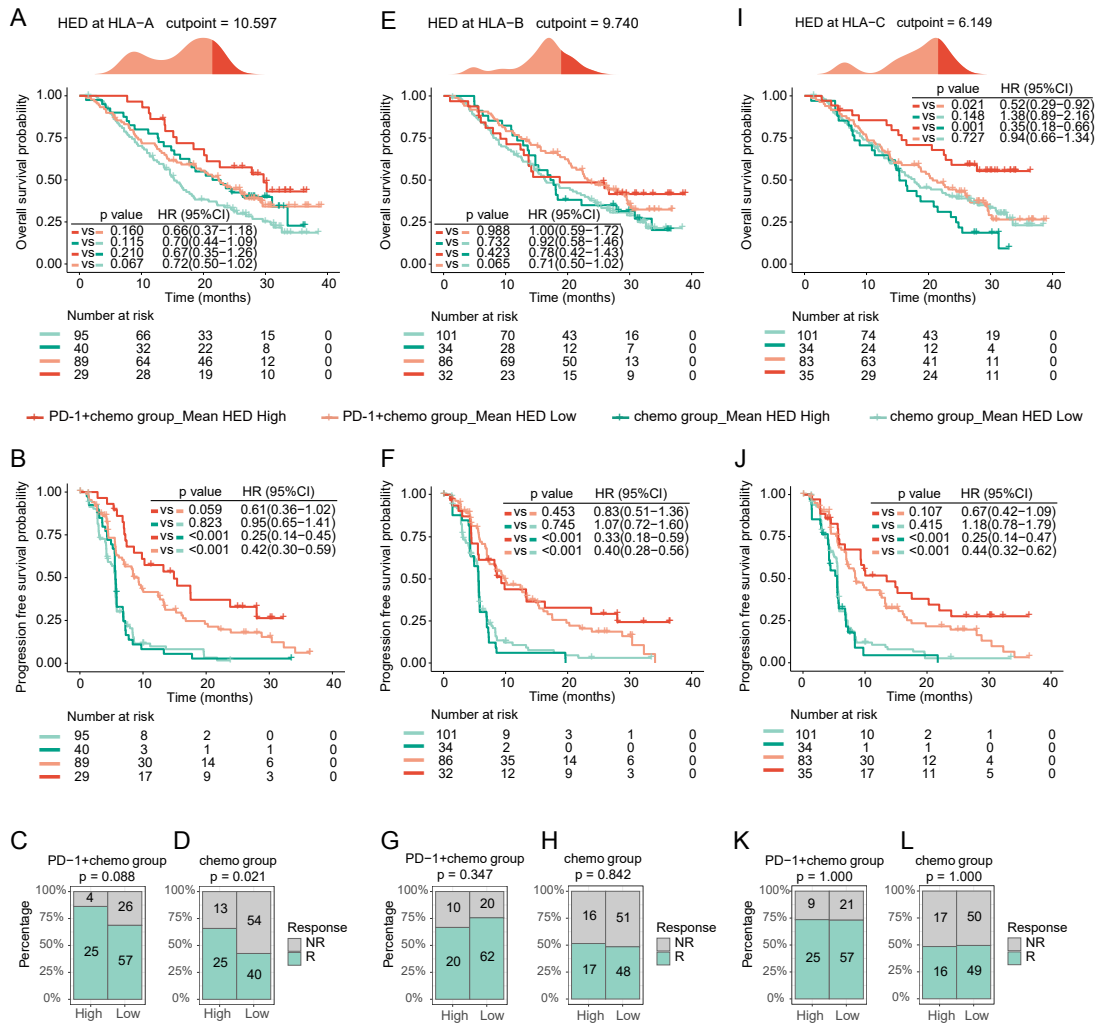

**A**, Association of HLA-A HED<sup>high</sup> with OS after PD-1 blockade plus chemotherapy or chemotherapy in Camel-sq trial of all patients (two-sided log-rank test). Density plots show the distribution and cut point (top quartile) for HLA-A mean HED used in Kaplan-Meier analysis. **B**, Association of HLA-A HED<sup>high</sup> with PFS after PD-1 blockade plus chemotherapy or chemotherapy in Camel-sq trial of all patients (two-sided log-rank test). **C**, Comparison of response rates between HLA-A HED<sup>high</sup> and HED<sup>low</sup> groups in PD-1 blockade plus chemotherapy arm in Camel-sq trial of all patients (two-sided Fisher's exact test). **D**, Comparison of response rates between HLA-A HED<sup>high</sup> and HED<sup>low</sup> groups in chemotherapy arm in Camel-sq trial of all patients (two-sided Fisher's exact test). **E**, Association of HLA-B HED<sup>high</sup> with OS after PD-1 blockade plus chemotherapy or chemotherapy in Camel-sq trial of all patients (two-sided log-rank test). Density plots show the distribution and cut point (top

quartile) for HLA-B mean HED used in Kaplan-Meier analysis. **Ff**, Association of HLA-B HED<sup>high</sup> with PFS after PD-1 blockade plus chemotherapy or chemotherapy in Camel-sq trial of all patients (two-sided log-rank test). **G**, Comparison of response rates between HLA-B HED<sup>high</sup> and HED<sup>low</sup> groups in PD-1 blockade plus chemotherapy arm in Camel-sq trial of all patients (two-sided Fisher's exact test). **H**, Comparison of response rates between HLA-B HED<sup>high</sup> and HED<sup>low</sup> groups in chemotherapy arm in Camel-sq trial of all patients (two-sided Fisher's exact test). **Ii**, Association of HLA-C HED<sup>high</sup> with OS after PD-1 blockade plus chemotherapy or chemotherapy in Camel-sq trial of all patients (two-sided log-rank test). Density plots show the distribution and cut point (top quartile) for HLA-C mean HED used in Kaplan-Meier analysis. **J**, Association of HLA-C HED<sup>high</sup> with PFS after PD-1 blockade plus chemotherapy or chemotherapy in Camel-sq trial of all patients (two-sided log-rank test). **K**, Comparison of response rates between HLA-C HED<sup>high</sup> and HED<sup>low</sup> groups in PD-1 blockade plus chemotherapy arm in Camel-sq trial of all patients (two-sided Fisher's exact test). **L**, Comparison of response rates between HLA-C HED<sup>high</sup> and HED<sup>low</sup> groups in chemotherapy arm in Camel-sq trial of all patients (two-sided Fisher's exact test). HR, hazard ratio; CI, confidence interval; PD-1+chemo, PD-1 blockade plus chemotherapy; Chemo, chemotherapy; TPS, tumor proportional score; TMB, tumor mutational burden. R, response, included patients with complete and partial response per RECIST v1.1; NR, not response included patients with stable disease and disease progression per RECIST v1.1.

**Supplementary Figure S7. Effect of mean HED on HR from PFS across all possible cut points and association of HLA-I LOH with survival in all patients.**

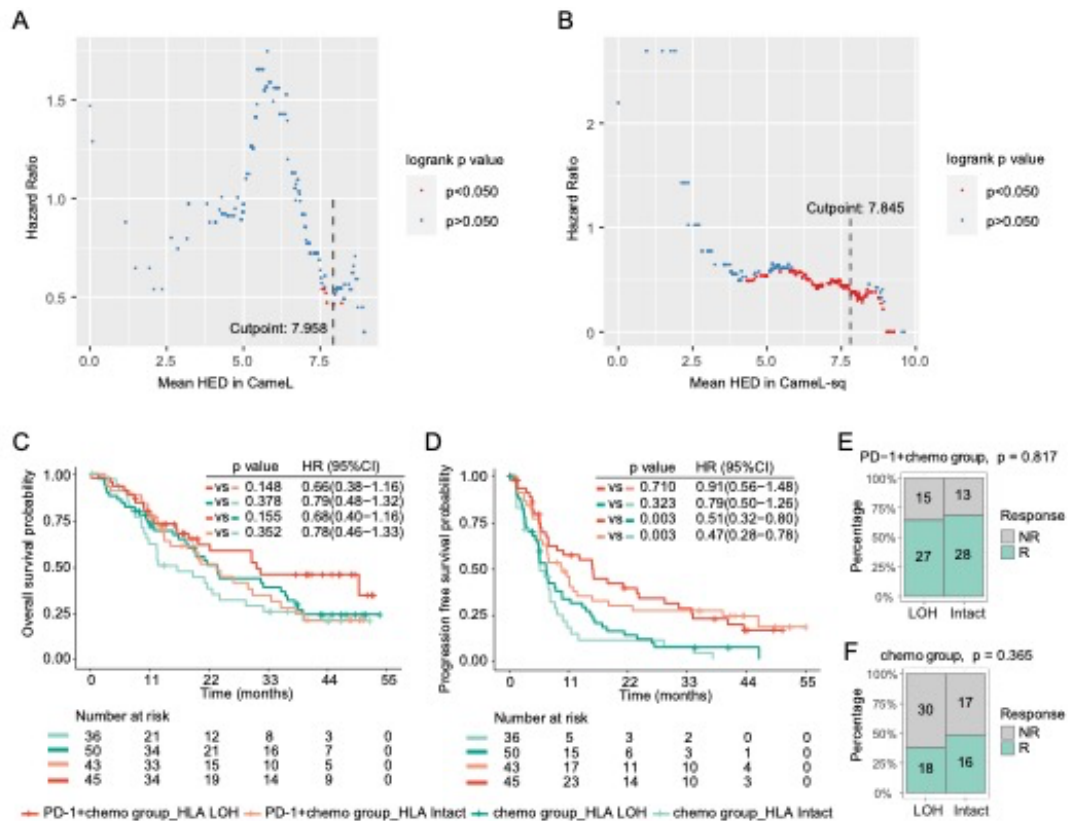

**A**, Effect of mean HED on HR from PFS across all possible cut points in CamelL trial. **B**, Effect of mean HED on HR from PFS across all possible cut points in CamelL-sq trial. **C**, Association of HLA-I LOH with OS after PD-1 blockade plus chemotherapy or chemotherapy in CamelL trial of all patients (two-sided log-rank test). **D**, Association of HLA-I LOH with PFS after PD-1 blockade plus chemotherapy or chemotherapy in CamelL trial of all patients (two-sided log-rank test). **E**, Comparison of response rates between patients with and without HLA-I LOH in PD-1 blockade plus chemotherapy arm in CamelL trial of all patients (two-sided Fisher's exact test). **D**, Comparison of response rates between patients with and without HLA-I LOH in chemotherapy arm in CamelL trial of all patients (two-sided Fisher's exact test). HR, hazard ratio; CI, confidence interval; HLA LOH, HLA class I loss of heterozygosity; PD-1+chemo, PD-1 blockade plus chemotherapy; Chemo, chemotherapy; R, response, included patients with complete and partial response per RECIST v1.1; NR, not response included patients with stable disease and disease progression per RECIST v1.1.

**Supplementary Figure S8. Combination of mean HED and PD-L1 expression showed better predictive performance in CamelL-sq trial.**

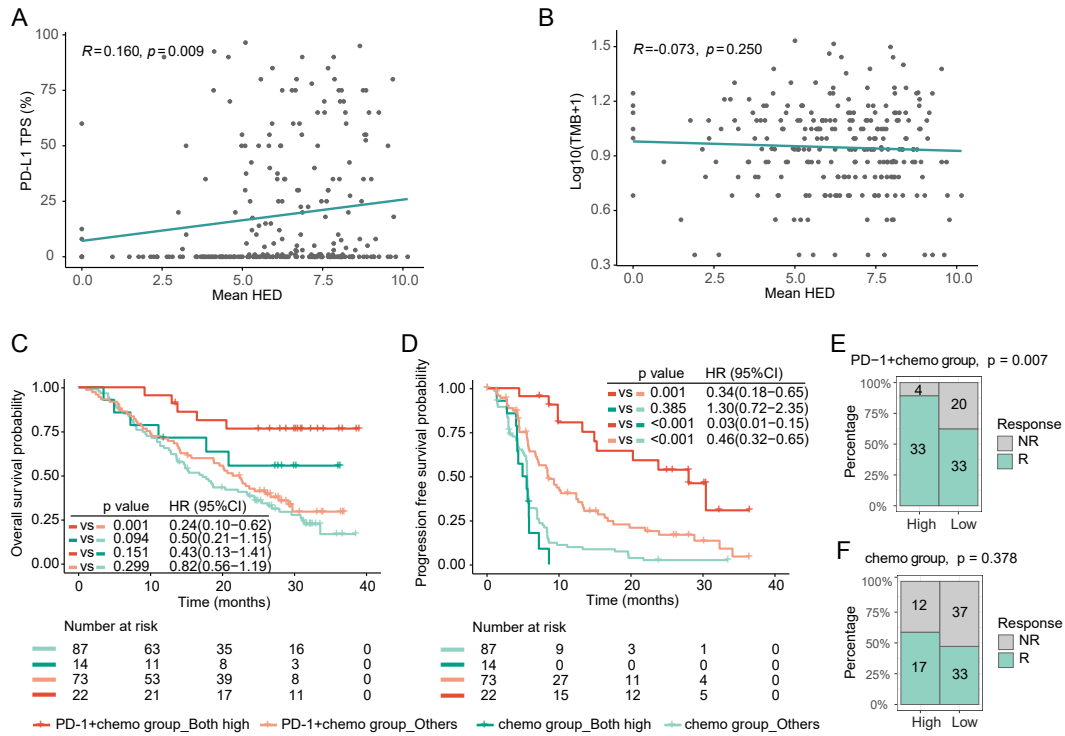

**A**, Correlation of mean HED with PD-L1 TPS ( $P = 0.157$ ; two-sided Spearman's correlation). **B**, Correlation of mean HED with TMB ( $P = 0.229$ ; two-sided Kendall's rank correlation). **C**, OS comparisons between patients with both high and others after PD-1 blockade plus chemotherapy or chemotherapy among fully heterozygous patients (log-rank test). When combining mean HED and PD-L1 expression level, patients with both  $\text{hed}^{\text{high}}$  and positive PD-L1 expression were defined as the 'Both high' group, while the other patients belonged to the 'Others' group. **D**, PFS comparisons between patients with both high and others after PD-1 blockade plus chemotherapy or chemotherapy among fully heterozygous patients (log-rank test). **E**, Response rates comparison between patients with both high and others after PD-1 blockade plus chemotherapy among fully heterozygous patients (two-sided Fisher's exact test). **F**, Response rates comparison between patients with both high and others after chemotherapy among fully heterozygous patients (two-sided Fisher's exact test). HR, hazard ratio; CI, confidence interval; TPS, tumor proportional score; TMB, tumor mutational burden; PD-1+chemo, PD-1 blockade plus chemotherapy; Chemo, chemotherapy; R, response, included patients with complete and partial response per RECIST v1.1; NR, not response included patients with stable disease and disease progression per RECIST v1.1.

**Supplementary Figure S9. Association of HED at each HLA class I locus with PD-L1 expression level, TMB and neoantigen burden.**

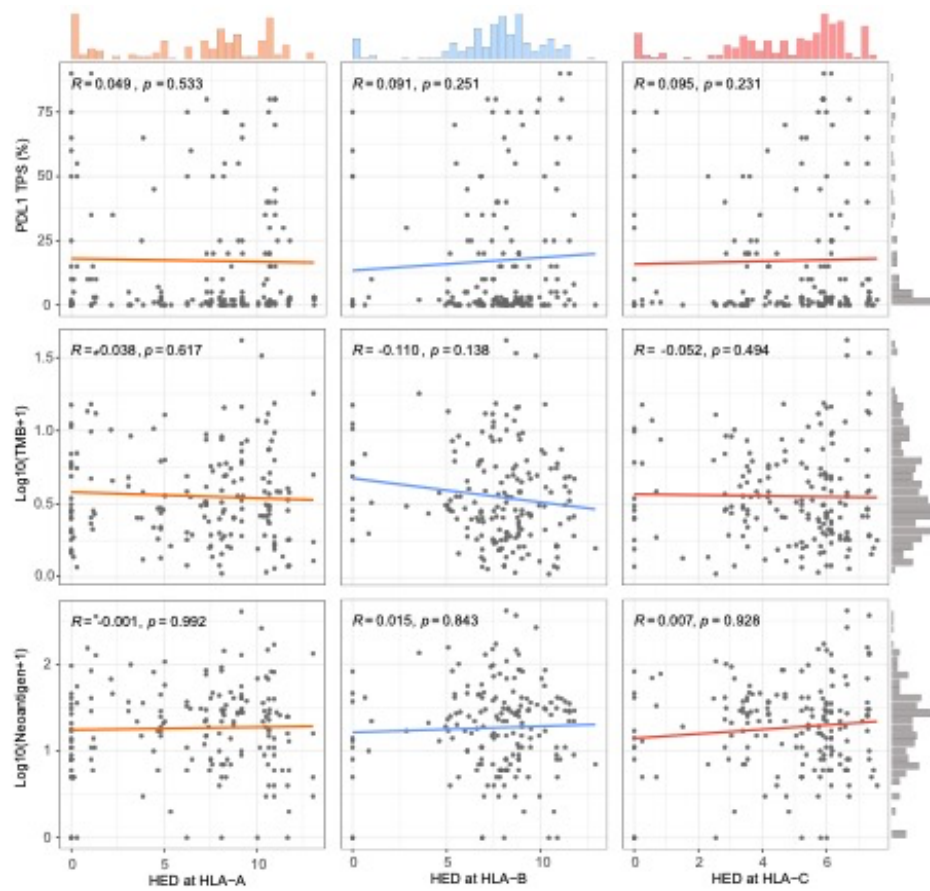

There was no any correlation between mean HED at each HLA-I locus and PD-L1 expression level, TMB or neoantigen burden.

**Supplementary Figure S10. Predictive value of joint utility of mean HED and TMB.**

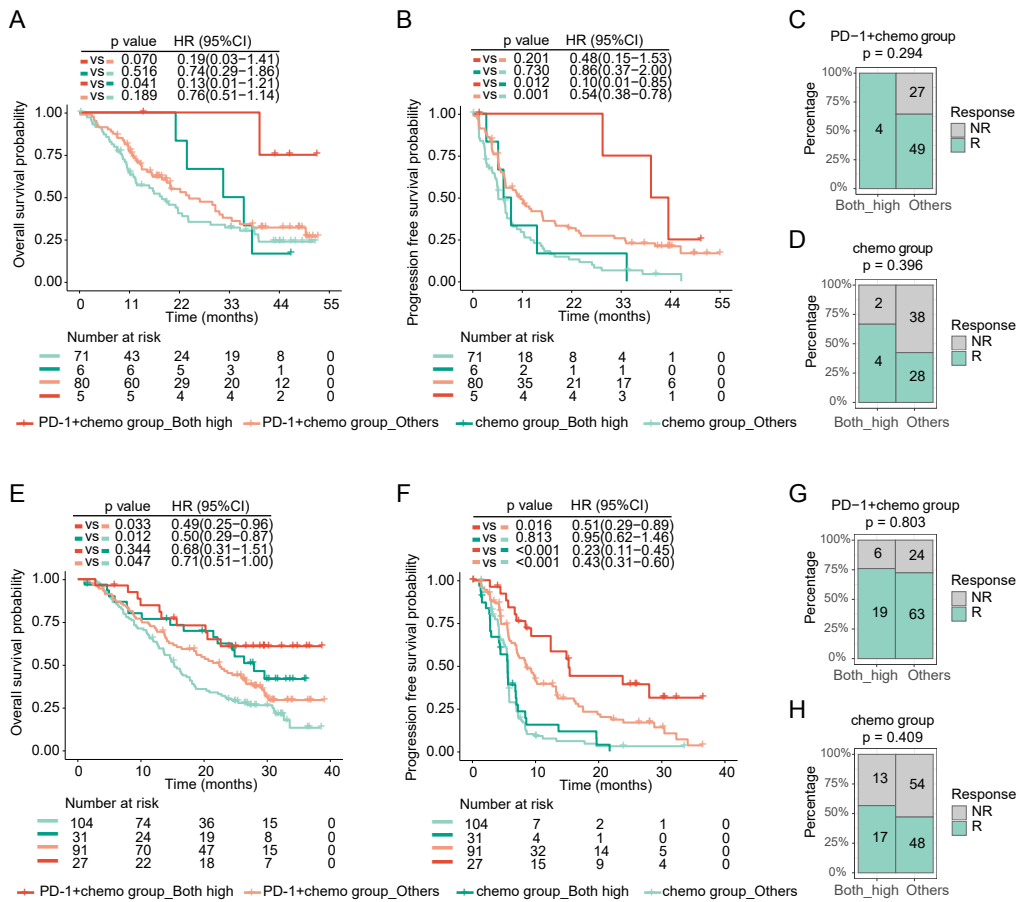

**A**, OS comparisons between patients with both high and others after PD-1 blockade plus chemotherapy or chemotherapy among fully heterozygous patients of Camel trial (log-rank test). When combining mean HED and TMB level, patients with both hed<sup>high</sup> and high TMB level ( $\geq 10$  Muts/Mb) were defined as the 'Both high' group, while the other patients belonged to the 'Others' group. **B**, PFS comparisons between patients with both high and others after PD-1 blockade plus chemotherapy or chemotherapy among fully heterozygous patients of Camel trial (log-rank test). **C**, Response rates comparison between patients with both high and others after PD-1 blockade plus chemotherapy among fully heterozygous patients of Camel trial (two-sided Fisher's exact test). **D**, Response rates comparison between patients with both high and others after chemotherapy among fully heterozygous patients of Camel trial (two-sided Fisher's exact test). **E**, OS comparisons between patients with both high and others after PD-1 blockade plus chemotherapy or chemotherapy among fully heterozygous patients of Camel-sq trial (log-rank test). **F**, PFS comparisons between patients with both high and others after PD-1 blockade plus chemotherapy or chemotherapy among fully heterozygous patients of

Camel-sq trial (log-rank test). **G**, Response rates comparison between patients with both high and others after PD-1 blockade plus chemotherapy among fully heterozygous patients of Camel-sq trial (two-sided Fisher's exact test test). **H**, Response rates comparison between patients with both high and others after chemotherapy among fully heterozygous patients of Camel-sq trial (two-sided Fisher's exact test test). HR, hazard ratio; CI, confidence interval; TMB, tumor mutational burden; PD-1+chemo, PD-1 blockade plus chemotherapy; Chemo, chemotherapy; R, response, included patients with complete and partial response per RECIST v1.1; NR, not response included patients with stable disease and disease progression per RECIST v1.1.

**Supplementary Figure S11. Predictive value of HED<sup>high</sup> in patients treated with PD-1 blockade plus chemotherapy according to TMB level.**

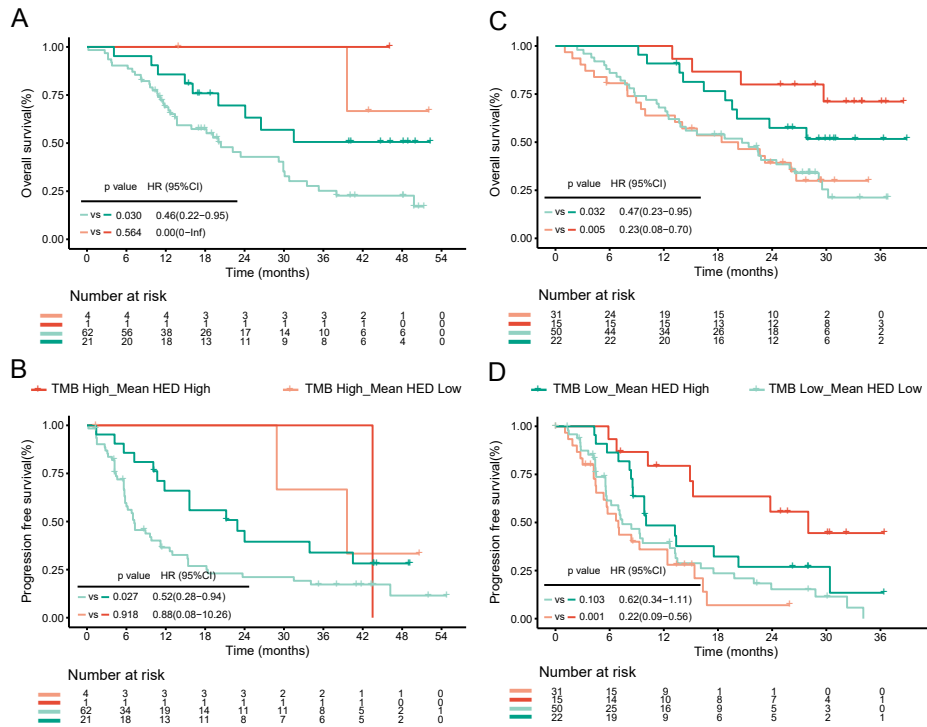

**A**, OS comparisons between patients with distinct TMB level and HED after PD-1 blockade plus chemotherapy in CamelL study. **B**, PFS comparisons between patients with distinct TMB level and HED after PD-1 blockade plus chemotherapy in CamelL study. **C**, OS comparisons between patients with distinct TMB level and HED after PD-1 blockade plus chemotherapy in CamelL-sq study. **D**, PFS comparisons between patients with distinct TMB level and HED after PD-1 blockade plus chemotherapy in CamelL-sq study.



**Supplementary Figure S12. Identification of major cell types in patients with untreated NSCLC.**

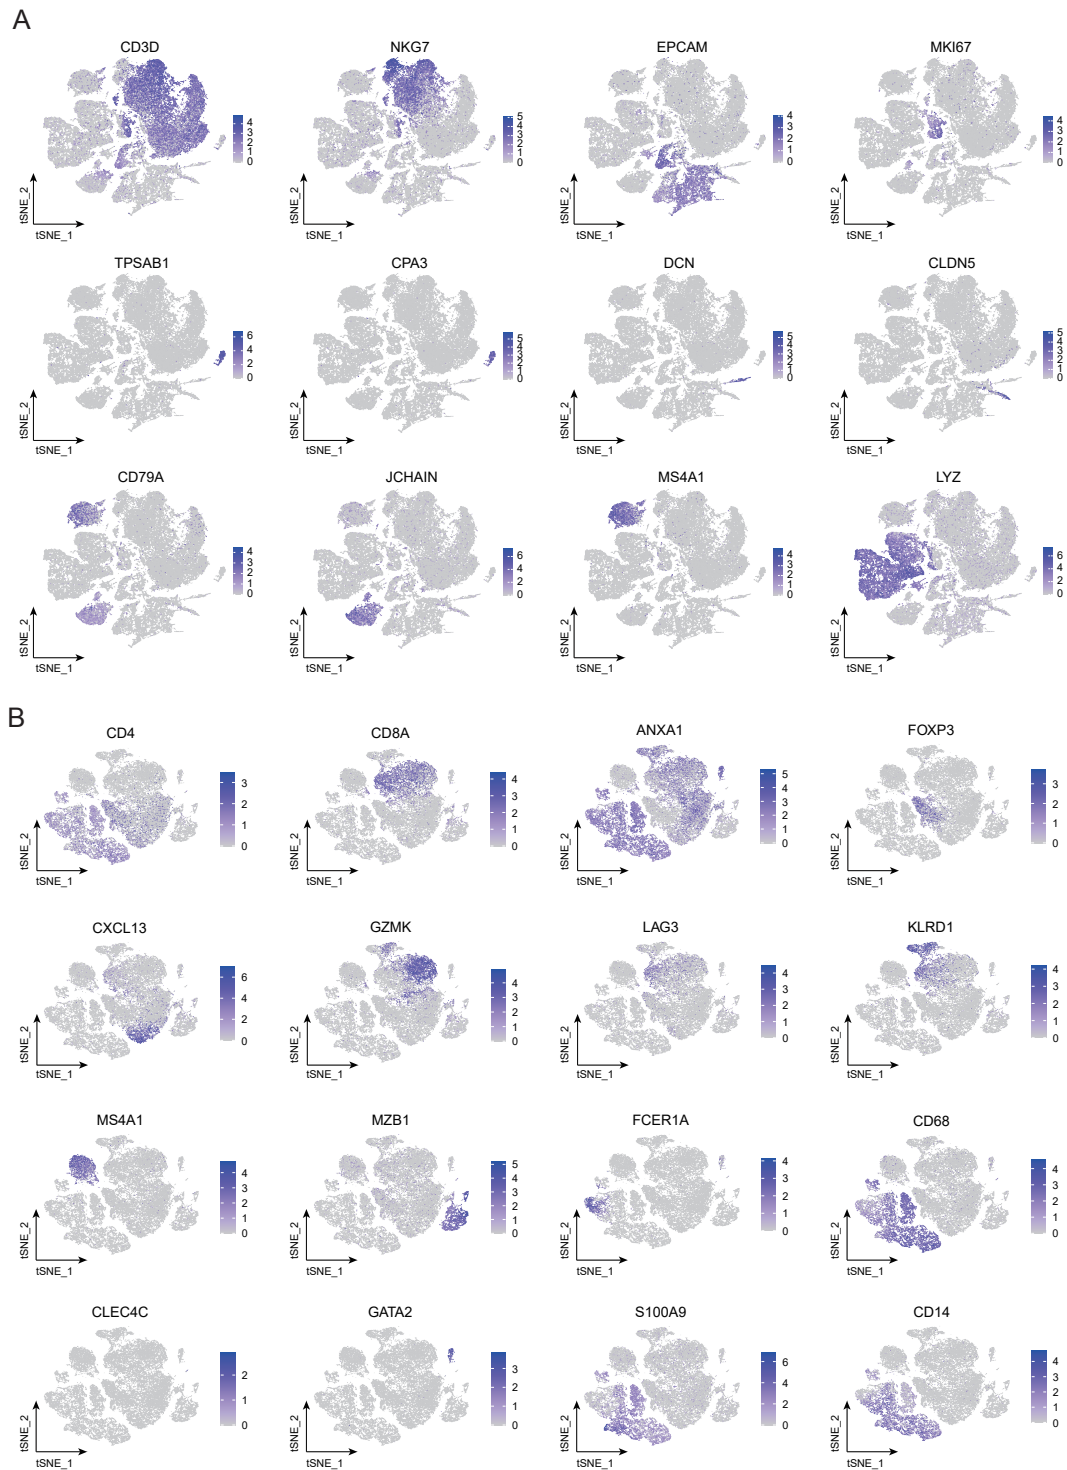

**A**, t-SNE plots show the expression levels of cell-type marker genes in total cells from 11 patients. **B**, t-SNE plots show the expression levels of cell-type marker genes in immune cells from 11 patients. tSNE, t-distributed Stochastic Neighborhood Embedding.

**Supplementary Figure S13. Characterization of immune cell types in patients with untreated NSCLC.**

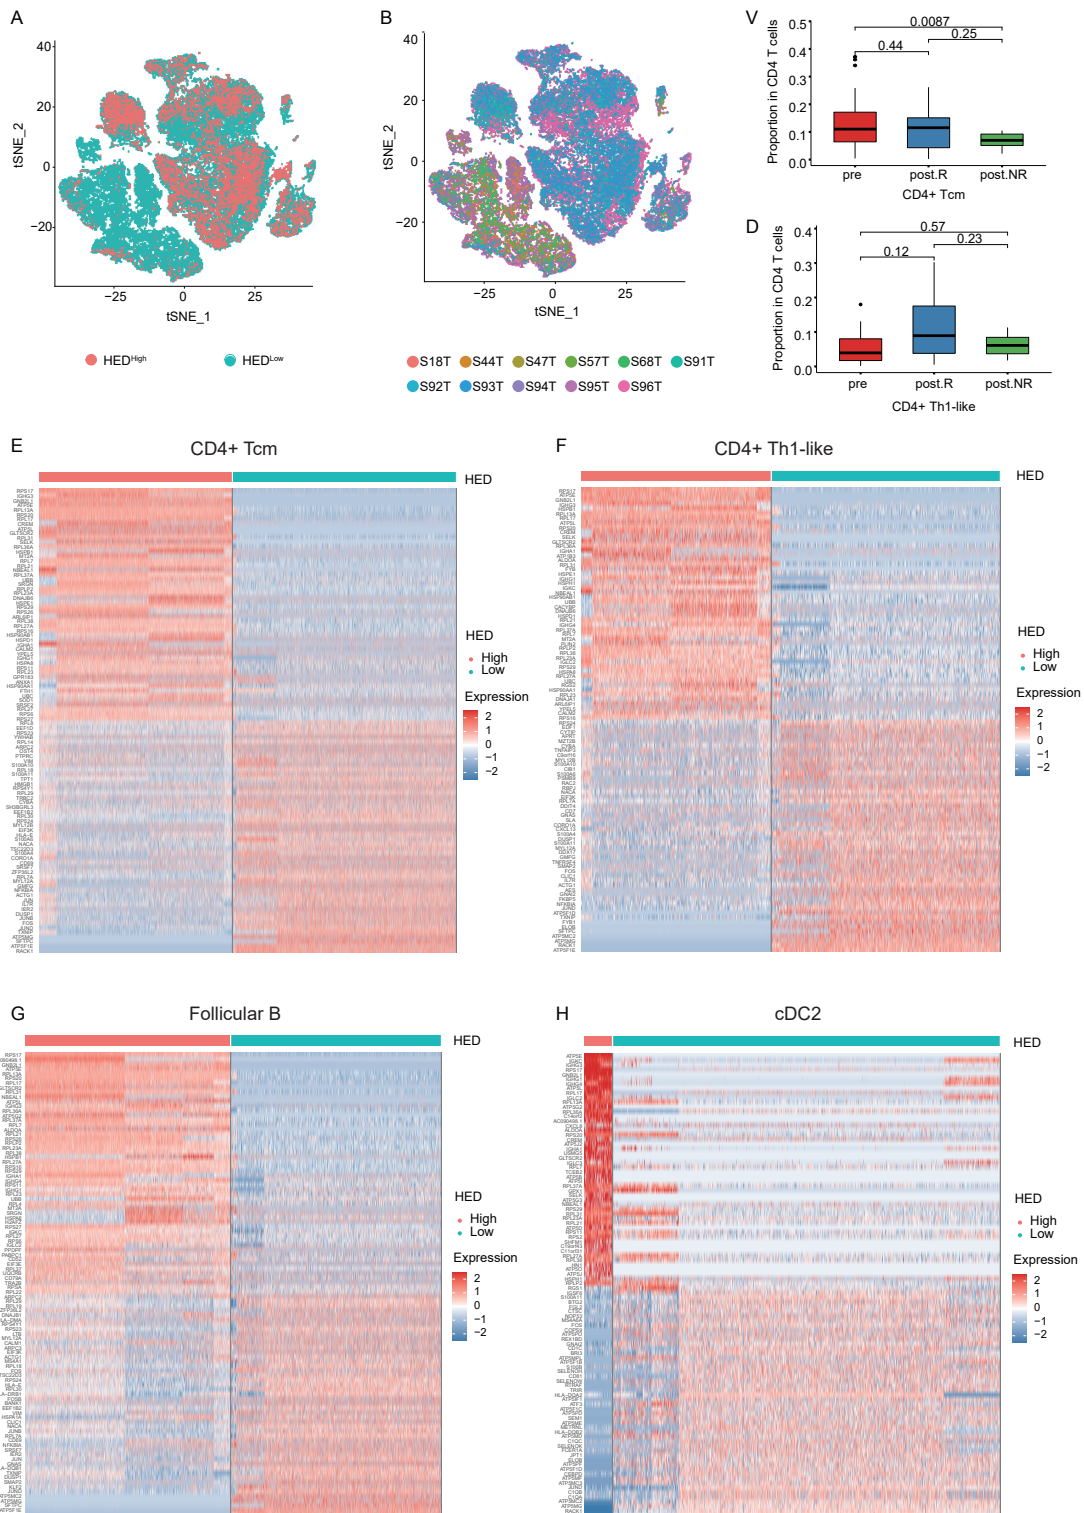

**A-B**, t-SNE plots show 40,400 immune cells from 11 NSCLC patients. Points are color-coded by HED (**A**) and included patients (**B**). **C-D**, Boxplot shows the proportion of CD4+ Tcm (**C**) and

CD4+ Th1-like (**D**) in CD4 T cells at pre- and post-treatment (post.R represents responsive samples; post.NR represents non-responsive samples). *P*-values are calculated using two-sided student t-test. **E-H**, Heatmaps show the expression of top 100 differentially expressed gene with  $|\log_2\text{fold Change}| > 0.5$  and adjusted *P* value  $< 0.01$ , selected from CD4+ Tcm (**E**), CD4+ Th1-like (**F**), Follicular B (**G**) and cdc2 (**H**) between  $\text{hed}^{\text{high}}$  and  $\text{hed}^{\text{low}}$  samples, respectively. tSNE, t-distributed Stochastic Neighborhood Embedding.

**Supplementary Table S1: Baseline characteristics of included patients from the biomarker evaluable population and intention-to-treat cohort in CamelL study.**

| Items                         | Biomarker evaluable trial     |                    | Intention-to-treat population |                    | P value |
|-------------------------------|-------------------------------|--------------------|-------------------------------|--------------------|---------|
|                               | Camrelizumb plus chemotherapy | Chemotherapy alone | Camrelizumb plus chemotherapy | Chemotherapy alone |         |
|                               | (n=88)                        | (n=86)             | (n=205)                       | (n=207)            |         |
| Age                           |                               |                    |                               |                    |         |
| ≥65 years                     | 12 (14%)                      | 28 (33%)           | 45 (22%)                      | 53 (26%)           | 0.835   |
| <65 years                     | 76 (86%)                      | 58 (67%)           | 160 (78%)                     | 154 (74%)          |         |
| Sex                           |                               |                    |                               |                    |         |
| Male                          | 61 (69%)                      | 68 (79%)           | 146 (71%)                     | 149 (72%)          | 0.531   |
| Female                        | 27 (31%)                      | 18 (21%)           | 59 (29%)                      | 58 (28%)           |         |
| Smoking history               |                               |                    |                               |                    |         |
| ≥400 cigarette-years          | 62 (70%)                      | 57 (66%)           | 127 (62%)                     | 130 (63%)          | 0.166   |
| <400 cigarette-years or never | 26 (30%)                      | 29 (34%)           | 78 (38%)                      | 77 (37%)           |         |
| ECOG performance status       |                               |                    |                               |                    |         |
| 0                             | 24 (27%)                      | 17 (20%)           | 48 (23%)                      | 36 (17%)           | 0.391   |
| 1                             | 64 (73%)                      | 69 (80%)           | 157 (77%)                     | 171 (83%)          |         |
| Disease stage                 |                               |                    |                               |                    |         |
| IIIB/IIIC                     | 15 (17%)                      | 13 (15%)           | 30 (15%)                      | 41 (20%)           | 0.736   |
| IV                            | 73 (83%)                      | 73 (85%)           | 175 (85%)                     | 166 (80%)          |         |
| Histological type             |                               |                    |                               |                    |         |
| Adenocarcinoma                | 86 (98%)                      | 84 (98%)           | 202 (99%)                     | 204 (99%)          | 0.711   |
| Non-adenocarcinoma            | 2 (2%)                        | 2 (2%)             | 3 (1%)                        | 3 (1%)             |         |
| Brain metastases at baseline  |                               |                    |                               |                    |         |
| Yes                           | 2 (2%)                        | 3 (3%)             | 10 (5%)                       | 5 (2%)             | 0.640   |
| No                            | 86 (98%)                      | 83 (97%)           | 195 (95%)                     | 202 (98%)          |         |
| PD-L1 tumor proportion score  |                               |                    |                               |                    |         |
| <1%                           | 19 (22%)                      | 21 (24%)           | 49 (24%)                      | 69 (34%)           | 0.115   |
| ≥1%                           | 65 (74%)                      | 56 (65%)           | 138 (67%)                     | 117 (57%)          |         |
| Not evaluable                 | 3 (3%)                        | 9 (10%)            | 18 (9%)                       | 21 (10%)           |         |

ECOG, Eastern Cooperative Oncology Group.

**Supplementary Table S2: Baseline characteristics of included patients from the biomarker evaluable population and intention-to-treat cohort in Camel-sq study.**

|                                 | Biomarker evaluable trial        |                              | Intention-to-treat population    |                              | P value |
|---------------------------------|----------------------------------|------------------------------|----------------------------------|------------------------------|---------|
|                                 | Camrelizumb plus<br>chemotherapy | Placebo plus<br>chemotherapy | Camrelizumb plus<br>chemotherapy | Placebo plus<br>chemotherapy |         |
|                                 | (n=118)                          | (n=135)                      | (n=193)                          | (n=196)                      |         |
| Age                             |                                  |                              |                                  |                              |         |
| ≥65 years                       | 55 (47%)                         | 52 (44%)                     | 84 (44%)                         | 71 (36%)                     | 0.538   |
| <65 years                       | 63 (53%)                         | 83 (56%)                     | 109 (56%)                        | 125 (64%)                    |         |
| Sex                             |                                  |                              |                                  |                              |         |
| Male                            | 113 (96%)                        | 127 (94%)                    | 179 (93%)                        | 180 (92%)                    | 0.202   |
| Female                          | 5 (4%)                           | 8 (6%)                       | 14 (7%)                          | 16 (8%)                      |         |
| Smoking history                 |                                  |                              |                                  |                              |         |
| ≥400 cigarette-years            | 104 (88%)                        | 111 (82%)                    | 162 (84%)                        | 157 (80%)                    | 0.325   |
| <400 cigarette-years or never   | 14 (12%)                         | 24 (8%)                      | 31 (16%)                         | 39 (20%)                     |         |
| ECOG performance status         |                                  |                              |                                  |                              |         |
| 0                               | 21 (18%)                         | 30 (22%)                     | 38 (20%)                         | 43 (22%)                     | 0.839   |
| 1                               | 97 (82%)                         | 105 (78%)                    | 155 (80%)                        | 153 (78%)                    |         |
| Disease stage                   |                                  |                              |                                  |                              |         |
| IIIB/IIIC                       | 34 (29%)                         | 40 (30%)                     | 54 (28%)                         | 55 (28%)                     | 0.736   |
| IV                              | 84 (71%)                         | 95 (70%)                     | 139 (72%)                        | 141 (72%)                    |         |
| Brain metastases at enrollment* |                                  |                              |                                  |                              |         |
| Yes                             | 1 (1%)                           | 3 (2%)                       | 4 (2%)                           | 3 (2%)                       | 0.918   |
| No                              | 117 (99%)                        | 132 (98%)                    | 189 (98%)                        | 193 (98%)                    |         |
| PD-L1 tumor proportion score    |                                  |                              |                                  |                              |         |
| <1%                             | 55 (47%)                         | 68 (50%)                     | 91 (47%)                         | 97 (49%)                     | 0.943   |
| ≥1%                             | 63 (53%)                         | 67 (50%)                     | 95 (49%)                         | 93 (47%)                     |         |
| Not evaluable                   | 0 (0%)                           | 0 (0%)                       | 7 (4%)                           | 6 (3%)                       |         |

Data are n (%), unless otherwise indicated. \* No patients with both liver and lung metastases were enrolled. ECOG, Eastern Cooperative Oncology Group.

**Supplementary Table S3. Baseline parameters of included 11 patients.**

| Sample ID | Histology | Sex    | Age | Smoking history | Stage   | HED HLA-A | HED HLA-B | HED HLA-C | Mean HED |
|-----------|-----------|--------|-----|-----------------|---------|-----------|-----------|-----------|----------|
| S18T      | LUAD      | Female | 60  | No              | T1bN0M0 | 0.31      | 7.12      | 6.89      | 4.77     |
| S44T      | LUAD      | Female | 73  | No              | T1aN2M0 | 1.07      | 10.87     | 5.23      | 5.72     |
| S47T      | LUSC      | Male   | 67  | Yes             | T2aN0M0 | 8.10      | 10.23     | 2.73      | 7.02     |
| S57T      | LUSC      | Male   | 65  | No              | T2bN1M0 | 7.46      | 10.17     | 3.59      | 7.07     |
| S68T      | LUSC      | Male   | 66  | No              | T2aN0M0 | 7.04      | 7.51      | 4.71      | 6.42     |
| S91T      | LUAD      | Female | 64  | No              | T1bN0M0 | 10.94     | 7.06      | 6.18      | 8.06     |
| S92T      | LUAD      | Male   | 62  | No              | T1bN0M0 | 11.57     | 9.11      | 5.88      | 8.86     |
| S93T      | LUSC      | Male   | 69  | Yes             | T1bN0M0 | 10.66     | 10.75     | 2.90      | 8.10     |
| S94T      | LUAD      | Male   | 64  | Yes             | T1cN0M0 | 8.24      | 8.64      | 6.01      | 7.63     |
| S95T      | LUAD      | Female | 77  | No              | T2aN0M0 | 8.10      | 3.88      | 6.43      | 6.14     |
| S96T      | LUAD      | Male   | 56  | No              | T1cN2M0 | 0.00      | 6.99      | 0.69      | 2.56     |

LUAD, lung adenocarcinoma; LUSC, lung squamous cell carcinoma.

**Supplementary Table S4.** Table of Research Resource Identifier.

| <b>Tool and Resources</b>                            | <b>RRID</b>     | <b>Link</b>                                                                                                                                                                                                 |
|------------------------------------------------------|-----------------|-------------------------------------------------------------------------------------------------------------------------------------------------------------------------------------------------------------|
| Agilent 2100 BioAnalyzer                             | RRID:SCR_019715 | <a href="https://www.agilent.com/cs/library/posters/Public/BioAnalyzer.PDF">https://www.agilent.com/cs/library/posters/Public/BioAnalyzer.PDF</a>                                                           |
| OptiType                                             | RRID:SCR_022279 | <a href="https://github.com/FRED-2/OptiType">https://github.com/FRED-2/OptiType</a>                                                                                                                         |
| IMGT/HLA                                             | RRID:SCR_002971 | <a href="http://www.ebi.ac.uk/imgt/hla/">http://www.ebi.ac.uk/imgt/hla/</a>                                                                                                                                 |
| LOHHLA                                               | RRID:SCR_023690 | <a href="https://github.com/slagtermaarten/LOHHLA">https://github.com/slagtermaarten/LOHHLA</a>                                                                                                             |
| Illumina HiSeq4000                                   | RRID:SCR_016386 | <a href="https://www.illumina.com/systems/sequencing-platforms/hiseq-3000-4000.html">https://www.illumina.com/systems/sequencing-platforms/hiseq-3000-4000.html</a>                                         |
| bcl2fastq                                            | RRID:SCR_015058 | <a href="https://support.illumina.com/sequencing/sequencing_software/bcl2fastq-conversion-software.html">https://support.illumina.com/sequencing/sequencing_software/bcl2fastq-conversion-software.html</a> |
| Trimmomatic                                          | RRID:SCR_011848 | <a href="http://www.usadellab.org/cms/index.php?page=trimmomatic">http://www.usadellab.org/cms/index.php?page=trimmomatic</a>                                                                               |
| NCBI Build 37.5 (NCBI Assembly Archive Viewer)       | RRID:SCR_012917 | <a href="https://www.ncbi.nlm.nih.gov/assembly">https://www.ncbi.nlm.nih.gov/assembly</a>                                                                                                                   |
| Burrows-Wheeler Aligner (BWA)                        | RRID:SCR_010910 | <a href="http://bio-bwa.sourceforge.net/">http://bio-bwa.sourceforge.net/</a>                                                                                                                               |
| Picard                                               | RRID:SCR_006525 | <a href="http://broadinstitute.github.io/picard/">http://broadinstitute.github.io/picard/</a>                                                                                                               |
| Genome Analysis Toolkit (GATK)                       | RRID:SCR_001876 | <a href="https://software.broadinstitute.org/gatk/">https://software.broadinstitute.org/gatk/</a>                                                                                                           |
| MuTect                                               | RRID:SCR_000559 | <a href="http://www.broadinstitute.org/cancer/cga/mutect">http://www.broadinstitute.org/cancer/cga/mutect</a>                                                                                               |
| ENCODE                                               | RRID:SCR_006793 | <a href="http://genome.ucsc.edu/ENCODE">http://genome.ucsc.edu/ENCODE</a>                                                                                                                                   |
| ANNOVAR                                              | RRID:SCR_012821 | <a href="http://www.openbioinformatics.org/annovar/">http://www.openbioinformatics.org/annovar/</a>                                                                                                         |
| Exome Aggregation Consortium (ExAC)                  | RRID:SCR_004068 | <a href="http://exac.broadinstitute.org/">http://exac.broadinstitute.org/</a>                                                                                                                               |
| Genome Aggregation Database (gnomAD)                 | RRID:SCR_014964 | <a href="http://gnomad.broadinstitute.org/">http://gnomad.broadinstitute.org/</a>                                                                                                                           |
| COSMIC                                               | RRID:SCR_002260 | <a href="http://cancer.sanger.ac.uk/cancergenome/projects/cosmic/">http://cancer.sanger.ac.uk/cancergenome/projects/cosmic/</a>                                                                             |
| CNVkit                                               | RRID:SCR_021917 | <a href="https://github.com/etal/cnvkit">https://github.com/etal/cnvkit</a>                                                                                                                                 |
| dbSNP                                                | RRID:SCR_002338 | <a href="http://www.ncbi.nlm.nih.gov/SNP/">http://www.ncbi.nlm.nih.gov/SNP/</a>                                                                                                                             |
| HLA-HD                                               | RRID:SCR_022285 | <a href="https://www.genome.med.kyoto-u.ac.jp/HLA-HD/">https://www.genome.med.kyoto-u.ac.jp/HLA-HD/</a>                                                                                                     |
| NetMHCpan 4.0                                        | RRID:SCR_018182 | <a href="http://www.cbs.dtu.dk/services/NetMHCpan/">http://www.cbs.dtu.dk/services/NetMHCpan/</a>                                                                                                           |
| Immune Epitope Database and Analysis Resource (IEDB) | RRID:SCR_006604 | <a href="http://www.immuneepitope.org/">http://www.immuneepitope.org/</a>                                                                                                                                   |
| HLA-ATHLATES                                         | RRID:SCR_023689 | <a href="https://github.com/cliu32/athlates">https://github.com/cliu32/athlates</a>                                                                                                                         |
| Seurat                                               | RRID:SCR_016341 | <a href="https://satijalab.org/seurat/get_started.html">https://satijalab.org/seurat/get_started.html</a>                                                                                                   |
| R (version 4.1.3)                                    | RRID:SCR_001905 | <a href="http://www.r-project.org/">http://www.r-project.org/</a>                                                                                                                                           |
| clusterProfiler                                      | RRID:SCR_016884 | <a href="http://bioconductor.org/packages/release/bioc/html/clusterProfiler.html">http://bioconductor.org/packages/release/bioc/html/clusterProfiler.html</a>                                               |

|                                                                                         |                 |                                                                                         |
|-----------------------------------------------------------------------------------------|-----------------|-----------------------------------------------------------------------------------------|
| BD Biosciences (Ethylene diamine tetraacetic acid (EDTA)-coated tubes)                  | RRID:SCR_013311 | <a href="http://www.bdbiosciences.com/us/home">http://www.bdbiosciences.com/us/home</a> |
| QIAGEN (QIAamp DNA FFPE Tissue Kit, DNeasy Blood and Tissue Kit, GeneRead DNA FFPE Kit) | RRID:SCR_008539 | <a href="http://www.qiagen.com">http://www.qiagen.com</a>                               |
| Thermo Fisher Scientific (Qubit dsDNA High Sensitivity Assay Kit)                       | RRID:SCR_008452 | <a href="http://www.fishersci.com">http://www.fishersci.com</a>                         |
| Roche (KAPA Hyper Prep Kit, KAPA Library Quantification Kit)                            | RRID:SCR_001326 | <a href="http://www.roche.com/">http://www.roche.com/</a>                               |
| TIANGEN (TGuide S32 Magnetic Blood Genomic DNA Kit)                                     | RRID:SCR_023688 | <a href="https://www.tiangen.com/">https://www.tiangen.com/</a>                         |

---
